# Comparative Genomics of Cultured and Uncultured Strains Suggests Genes Essential for Free-Living Growth of *Liberibacter*

Jennie R. Fagen<sup>1</sup>, Michael T. Leonard<sup>1</sup>, Connor M. McCullough<sup>1</sup>, Janaka N. Edirisinghe<sup>2</sup>, Christopher S. Henry<sup>2</sup>, Michael J. Davis<sup>3</sup>, Eric W. Triplett<sup>1\*</sup>

**1** Microbiology and Cell Science Department, Institute of Food and Agricultural Sciences, University of Florida, Gainesville, Florida, United States of America, **2** Mathematics and Computer Science Division, Argonne National Laboratory, Argonne, Illinois, United States of America, **3** Plant Pathology Department, Citrus Research and Development Center, Institute of Food and Agricultural Sciences, University of Florida, Lake Alfred, Florida, United States of America

## Abstract

The full genomes of two uncultured plant pathogenic *Liberibacter*, *Ca. Liberibacter asiaticus* and *Ca. Liberibacter solanacearum*, are publicly available. Recently, the larger genome of a closely related cultured strain, *Liberibacter crescens* BT-1, was described. To gain insights into our current inability to culture most *Liberibacter*, a comparative genomics analysis was done based on the RAST, KEGG, and manual annotations of these three organisms. In addition, pathogenicity genes were examined in all three bacteria. Key deficiencies were identified in *Ca. L. asiaticus* and *Ca. L. solanacearum* that might suggest why these organisms have not yet been cultured. Over 100 genes involved in amino acid and vitamin synthesis were annotated exclusively in *L. crescens* BT-1. However, none of these deficiencies are limiting in the rich media used to date. Other genes exclusive to *L. crescens* BT-1 include those involved in cell division, the stringent response regulatory pathway, and multiple two component regulatory systems. These results indicate that *L. crescens* is capable of growth under a much wider range of conditions than the uncultured *Liberibacter* strains. No outstanding differences were noted in pathogenicity-associated systems, suggesting that *L. crescens* BT-1 may be a plant pathogen on an as yet unidentified host.

**Citation:** Fagen JR, Leonard MT, McCullough CM, Edirisinghe JN, Henry CS, et al. (2014) Comparative Genomics of Cultured and Uncultured Strains Suggests Genes Essential for Free-Living Growth of *Liberibacter*. PLoS ONE 9(1): e84469. doi:10.1371/journal.pone.0084469

**Editor:** John Parkinson, Hospital for Sick Children, Canada

**Received:** May 9, 2013; **Accepted:** November 21, 2013; **Published:** January 8, 2014

This is an open-access article, free of all copyright, and may be freely reproduced, distributed, transmitted, modified, built upon, or otherwise used by anyone for any lawful purpose. The work is made available under the Creative Commons CC0 public domain dedication.

**Funding:** This work was funded by the Citrus Research and Development Foundation grant number 336. The funders had no role in study design, data collection and analysis, decision to publish, or preparation of the manuscript.

**Competing Interests:** The authors have declared that no competing interests exist.

\* E-mail: ewt@ufl.edu

## Introduction

The *Ca. Liberibacter* genus contains suspected plant pathogens as well as plant endophytes [1]. Collectively, *Ca. L. asiaticus* (CLAs), *Ca. L. africanus* (CLaf), and *Ca. L. americanus* (CLam) cause a devastating disease on citrus known as Citrus Greening or Huanglongbing (HLB)[2,3,4]. *Ca. L. solanacearum* is the suspected causative agent of similar diseases on tomato and potato referred to as psyllid yellows and zebra chip (ZC), respectively [5,6]. These bacteria remain uncultured in the laboratory, slowing progress toward description and the development of effective treatments. The closest cultured relative to the *Ca. Liberibacter* genus, *Liberibacter crescens*, and its genome were recently described [7]. A comparison of this genome to the uncultured *Liberibacter* is anticipated to broaden our understanding of the nature of genome reduction and its effect on culturability, as well as aid in the development of a *Liberibacter* culturing medium.

To date, three *Liberibacter* genomes have been sequenced including *Liberibacter crescens* BT-1, *Ca. Liberibacter asiaticus* psy62 (CLAs), and *Ca. Liberibacter solanacearum* ZC1 (CLso). The genome sizes and other relevant characteristics of the strains from which they were derived are presented in Table 1. Genome comparisons have previously been published using CLAs, CLso, and organisms of the same family, Rhizobiaceae [8,9]. This

investigation adds value by comparing a cultured relative of the *Liberibacter* genus, and is anticipated to provide further insight into the limitations on cultivating other *Liberibacter* species. The genome of *L. crescens* is approximately 1.50 Mb [7], while the reduced genomes of CLAs and CLso are 1.23 Mb and 1.26 Mb, respectively [9,10]. The genetic information lacking in CLAs and CLso is potentially responsible for observed disparities in growth and virulence between *L. crescens* and these *Liberibacter* species.

## Materials and Methods

### Culturing *Liberibacter crescens*

*L. crescens* is grown on the artificial medium BM7 prepared as follows: 550 ml water, 2 g alpha-ketoglutarate, 10 g ACES buffer, 3.75 g KOH, adjust pH to 6.9 and sterilize in the autoclave for 15 minutes at 121°C. After cooling, 150 mL of fetal bovine serum (Hyclone) and 300 mL of TMN-FH (Hyclone) was added. *L. crescens* cultures were grown at 28°C in a shaking incubator at 125 rpm. DNA extraction, genomic sequencing, and microscopy of the strain were described previously [7].

### Genome comparisons

The genomes of *Liberibacter crescens* [CP003789.1], *Ca. Liberibacter asiaticus* [NC\_012985.3], and *Ca. Liberibacter solanacearum*

**Table 1.** Description of *Liberibacter* species.

|                    | <i>L. crescens</i> BT-1‡ | <i>Ca. L. asiaticus</i> psy62† | <i>Ca. L. solanacearum</i> ZC1◇ |
|--------------------|--------------------------|--------------------------------|---------------------------------|
| Class              | Alpha- proteobacteria    | Alpha-proteobacteria           | Alpha-proteobacteria            |
| Cultured           | Yes                      | No                             | No                              |
| Genome size        | 1.50 Mb                  | 1.23 Mb                        | 1.26 Mb                         |
| GC content         | 35.4%                    | 35.2%                          | 36.5%                           |
| Primary plant host | Babaco papaya            | Citrus                         | Tomato, potato                  |
| Tissue colonized   | Phloem                   | Phloem                         | Phloem                          |
| Disease caused     | Unknown                  | Huanglongbing                  | Zebra chip/psyllid yellows      |
| Insect vector      | Unknown                  | <i>D. citri</i>                | <i>B. cockerelli</i>            |

A brief comparison of the three sequenced *Liberibacter* species. ‡ Leonard et al 2012; † Duan et al 2009; ◇ Lin et al 2011. doi:10.1371/journal.pone.0084469.t001

[NC\_014774.1] were analyzed. All genomes were re-annotated using the RAST pipeline [11], although CLAs and CLso, were already present in the SEED database. The initial annotation and subsystem assignments were done in RAST and accessed with the SEED viewer [12]. The total features in each subsystem were determined from SEED v. nmpdr\_29 on biogin04.mcs.anl.gov and the percentage of each subsystem covered by the genomes was calculated (Table 2). Disparate functions were noted in the SEED viewer and investigated in KEGG [13,14]. All metabolically pertinent functional losses were confirmed manually using a BLAST search of the target genome [15].

### Virulence effectors

Previously identified secreted proteins from *Ca. L. asiaticus* psy62 [16] were checked bidirectionally against the *L. crescens* and *Ca. L. solanacearum* genomes using BLAST. Unidirectional hits and those with an e-value of greater than 0.001 were considered to be absent in the queried genome.

### Prophage comparisons

Taxonomic prediction of prophage regions was performed by Phage RAST [11]. Coding sequence prediction was also performed by Phage RAST through their self-trained version of GeneMark [17]. Functional prediction of coding sequences was performed by the RAST pipeline and a BLAST search against the EBI phage database and NCBI non-redundant (nr) database. Sequence comparison between *Ca. L. asiaticus*, *Ca. L. solanacearum*, and *L. crescens* was performed by the RAST pipeline and a BLAST search was conducted against databases of coding sequences for each prophage.

## Results and Discussion

### Liberibacter crescens cultural characteristics

*L. crescens* culture has a doubling time of 36.7 hours and reaches a maximum optical density of approximately 0.57 after 100 hours of incubation in liquid BM7 medium at 28°C (Figure S1). Circular, cream-colored colonies begin to appear 8–10 days after inoculation on solid BM7.

### Genome comparison

An alignment of all three *Liberibacter* genomes revealed no large continuous regions to be unique to *L. crescens* (Figure 1). This demonstrates that the approximately 0.25 Mb of additional sequence in the *L. crescens* genome is not the result of the incorporation of a large segment of DNA or the loss of a similar

segment in the CLAs and CLso genomes. Rather it seems that genome reduction in CLAs and CLso has taken place uniformly across their genomes. Initial annotations of the three *Liberibacter* genomes share 697 gene functions. A total of 207, 9, and 13 functions were unique to *L. crescens*, *Ca. L. asiaticus*, and *Ca. L. solanacearum*, respectively (Table 2, Figure 2, Figure S2). A nucleotide sequence based comparison of the *Liberibacter* genomes showed 235 hypothetical genes of unknown function to be present in *L. crescens* but not CLAs or CLso (Table S1).

### Biosynthesis

**Amino Acids.** Biosynthetic pathways and transporters for amino acids were examined in the three genomes. In total, the uncultured *Liberibacter* species lack the ability to synthesize six amino acids that are produced by *L. crescens* (Table 3). De novo synthetic pathways for proline, phenylalanine, tryptophan, cysteine, tyrosine, and histidine are found in *L. crescens* genome but are not produced by CLAs and CLso. This result is consistent with findings in previous *Liberibacter* genomic analyses [7,9,10]. *Liberibacter crescens* has a complete shikimic acid pathway, which contributes to the novo synthesis of the aromatic amino acids tyrosine, phenylalanine, and tryptophan. The shikimic acid pathway is absent in CLAs and CLso (Figure S3). However, multiple specific and nonspecific amino acid transporters are encoded by all *Liberibacter* species (Figure S2), which are expected to import essential amino acids or precursors from the plant or insect host. These differences in amino acid biosynthesis are not expected to impact culturing efforts so long as a complete set of amino acids and precursors are available in the growth medium.

**Cofactors.** Biosynthetic pathways of biotin, riboflavin, and pyridoxine were complete in all three genomes. Only *L. crescens* can produce (R)-pantothenate (Figure S4). CLAs and CLso have a specific thiamine transporter not found in *L. crescens*; but no pantothenate transporter was identified (Table 4). The folate (vitamin B9) production pathway in all three *Liberibacter* genomes lacks a key alkaline phosphatase (EC 3.1.3.1). This enzyme is present in *Rhizobiaceae* species. The remainder of the pathway is present in *L. crescens* and CLso, both of which may be able to bypass the missing alkaline phosphatase and produce folate through the use of a multifunctional phosphatase. However, CLAs lack genes fol1, folB, folK, and folP and therefore the folate synthesis pathway is presumed to be nonfunctional (Figure 3). All *Liberibacter* species lack biosynthetic pathways for cobalamin, pyridoxal phosphate, and niacin. However, *L. crescens* has a niacin/H<sup>+</sup> symporter (NiaP) not found in the other two *Liberibacter* genomes. NiaP in *Ralstonia solanacearum* transports nicotinate and is

**Table 2.** Genomic coverage of SEED subsystems.

| Subsystem                                       | Features in Subsystem | <i>L. crescens</i> genes (%) | <i>Ca. L. asiaticus</i> genes (%) | <i>Ca. L. solanacearum</i> genes (%) | <i>B. bacilliformis</i> KC583 genes (%) | <i>X. fastidiosa</i> 9a5C genes (%) |
|-------------------------------------------------|-----------------------|------------------------------|-----------------------------------|--------------------------------------|-----------------------------------------|-------------------------------------|
| Amino Acids and Derivatives                     | 863                   | 154 (17.8)                   | 69 (8.0)                          | 67 (7.8)                             | 104 (12.1)                              | 203 (23.5)                          |
| Carbohydrates                                   | 1859                  | 56 (3.0)                     | 41 (2.2)                          | 41 (2.2)                             | 51 (2.7)                                | 81 (4.4)                            |
| Cell Division and Cell Cycle                    | 111                   | 14 (12.6)                    | 13 (11.7)                         | 12 (10.8)                            | 23 (20.7)                               | 33 (29.7)                           |
| Cell Wall and Capsule                           | 687                   | 70 (10.2)                    | 65 (9.5)                          | 63 (9.2)                             | 67 (9.8)                                | 128 (18.6)                          |
| Cofactors, Vitamins, Prosthetic Groups Pigments | 776                   | 86 (11.1)                    | 69 (8.9)                          | 72 (9.3)                             | 94 (12.1)                               | 162 (20.9)                          |
| DNA Metabolism                                  | 311                   | 81 (26.0)                    | 82 (26.4)                         | 80 (25.7)                            | 73 (23.5)                               | 131 (42.1)                          |
| Dormancy and Sporulation                        | 205                   | 1 (0.5)                      | 1 (0.5)                           | 1 (0.5)                              | 1 (0.5)                                 | 1 (0.5)                             |
| Fatty Acids, Lipids, and Isoprenoids            | 270                   | 39 (14.4)                    | 28 (10.4)                         | 28 (10.4)                            | 35 (13.0)                               | 76 (28.1)                           |
| Membrane Transport                              | 379                   | 26 (6.9)                     | 18 (4.7)                          | 18 (4.7)                             | 31 (8.2)                                | 84 (22.2)                           |
| Metabolism of Aromatic Compounds                | 440                   | 5 (1.1)                      | 2 (0.5)                           | 2 (0.5)                              | 3 (0.7)                                 | 1 (0.2)                             |
| Miscellaneous                                   | 59                    | 28 (47.5)                    | 28 (47.5)                         | 23 (39.0)                            | 37 (62.7)                               | 17 (28.8)                           |
| Motility and Chemotaxis                         | 210                   | 39 (18.6)                    | 14 (6.7)                          | 15 (7.1)                             | 5 (2.4)                                 | 0 (0.0)                             |
| Nucleosides and Nucleotides                     | 240                   | 45 (18.8)                    | 52 (21.7)                         | 47 (19.6)                            | 52 (21.7)                               | 62 (25.8)                           |
| Phosphorus Metabolism                           | 82                    | 18 (22.0)                    | 11 (13.4)                         | 11 (13.4)                            | 13 (15.9)                               | 28 (34.1)                           |
| Potassium metabolism                            | 52                    | 4 (7.7)                      | 3 (5.8)                           | 3 (5.8)                              | 7 (13.5)                                | 7 (13.5)                            |
| Protein Metabolism                              | 808                   | 140 (17.3)                   | 135 (16.7)                        | 106 (13.1)                           | 188 (23.3)                              | 215 (26.6)                          |
| Regulation and Cell Signaling                   | 333                   | 18 (5.4)                     | 0 (0.0)                           | 0 (0.0)                              | 4 (1.2)                                 | 51 (15.3)                           |
| Respiration                                     | 902                   | 42 (4.7)                     | 44 (4.9)                          | 41 (4.5)                             | 58 (6.4)                                | 73 (8.1)                            |
| RNA metabolism                                  | 659                   | 91 (13.8)                    | 90 (13.7)                         | 92 (14.0)                            | 105 (15.9)                              | 115 (17.5)                          |
| Secondary Metabolism                            | 172                   | 4 (2.3)                      | 0 (0.0)                           | 0 (0.0)                              | 0 (0.0)                                 | 8 (4.7)                             |
| Stress Response                                 | 457                   | 40 (8.8)                     | 28 (6.1)                          | 26 (5.7)                             | 42 (9.2)                                | 66 (14.4)                           |
| Sulfur Metabolism                               | 147                   | 2 (1.4)                      | 2 (1.4)                           | 2 (1.4)                              | 2 (1.4)                                 | 20 (13.6)                           |
| Virulence, Disease and Defense                  | 1553                  | 28 (1.8)                     | 19 (1.2)                          | 20 (1.3)                             | 32 (2.1)                                | 37 (2.4)                            |

The total number of genes annotated in each SEED subsystem is shown. The number of subsystem genes identified in each studied genome is shown in bold, with the percent-coverage in parenthesis. Additional manual curation, independent of RAST, is not reflected in this table. doi:10.1371/journal.pone.0084469.t002

energy dependent [18]. The *L. crescens* NiaP sequence is most similar to those in *A. tumefaciens* and other *Rhizobiaceae*. All *Liberibacter*s are able to recycle NAD, however, none of them are able to synthesize NAD from aspartate or tryptophan. Therefore, CLAs and CLso must be importing nicotinate or NAD through an unidentified mechanism. This niacin transport requirement may contribute to the inability of CLAs and CLso to grow in current media formulations.

**Polyamines.** Putrescine and its derivatives, spermidine and norspermidine, are referred to collectively as polyamines. Polyamines are present in all branches of life and are thought to be a core metabolic requirement [19]. The putrescine production pathway is present in *L. crescens* but incomplete in CLAs and CLso, which lack ornithine decarboxylase [EC:4.1.1.17] (Figure S5). CLAs and CLso are able to metabolize putrescine but lack the necessary enzymes for de novo synthesis. The lack of polyamine synthesis in CLAs and CLso may constitute an important host-dependence, which hinders culturing efforts. When the spermidine biosynthetic pathway is partially inhibited in *R. leguminosarum*, a reduced growth rate is observed [20]. *R. leguminosarum* possesses multiple polyamine transporters [21] and the growth of the

spermidine synthesis mutant can be recovered with exogenous applications of spermidine, homospermidine, and norspermidine. The addition of these polyamines to the CLAs/CLso growth medium may improve growth. However, no polyamine transporter that would import putrescine or its precursors was identified in CLAs or CLso in this study or a previous in-depth prediction of ABC transporters in CLAs [22].

### Central carbon metabolism

CLAs and CLso were previously reported to lack the glucose-6-phosphate isomerase [9,10] and this absence was confirmed here. Glucose-6-phosphate isomerase is present in *L. crescens*, which has a complete Embden-Meyerhof glycolytic pathway. CLAs and CLso may circumvent the step catalyzed by glucose-6-phosphate isomerase by utilizing certain portions of the pentose phosphate pathway (PPP) (Figure S6). In such a scenario, two additional NADPH will be produced per glucose-1-phosphate in CLAs and CLso.

### Electron transport/respiration

All three *Liberibacter* genomes encode NADH dehydrogenase (NuoA-N), succinate dehydrogenase (SdhA-D), an O type terminal

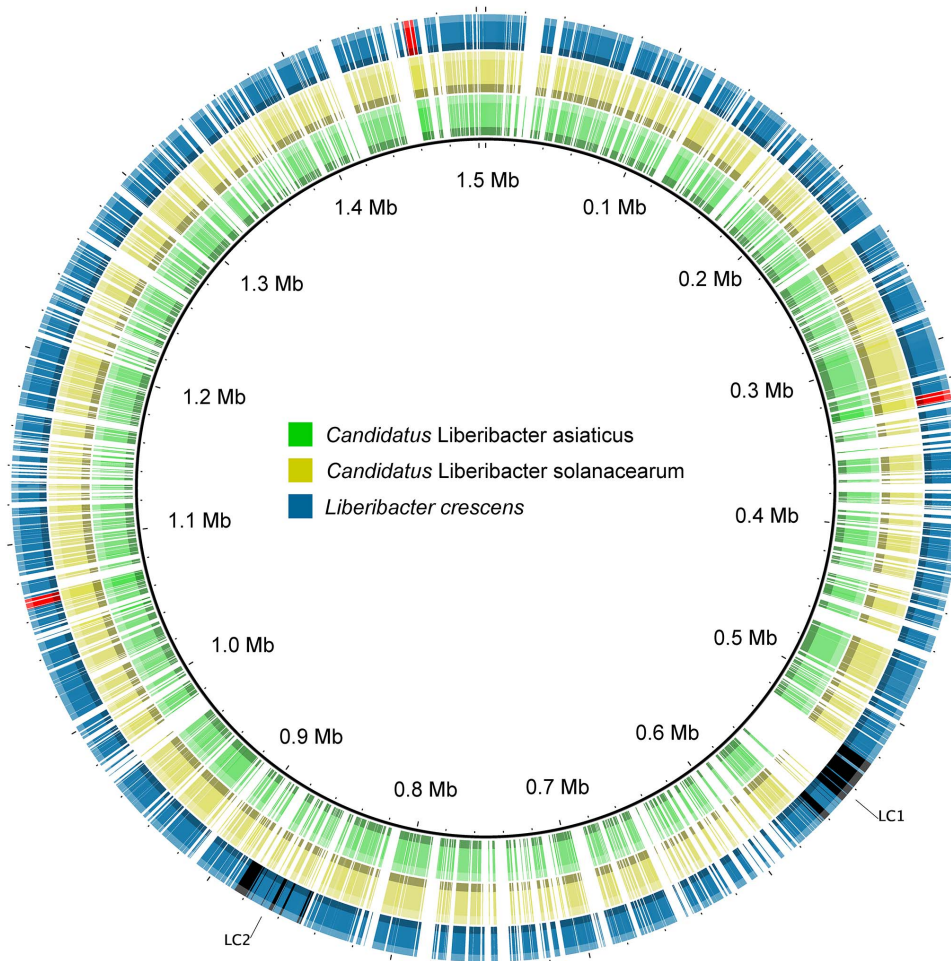

**Figure 1. *Liberibacter* genome alignment.** Microsynteny was observed across all three sequenced *Liberibacter* genomes, using *L. crescens* as a reference. From outer to inner circle: *L. crescens* (blue), CLso (yellow), CLAs (green). Additionally, prophage regions (black) and rRNA operons (red) are denoted for *L. crescens*.

doi:10.1371/journal.pone.0084469.g001

respiratory oxidase (CyoABCDE), and an F-type ATPase. In addition to these, *L. crescens* has a cytochrome d type ubiquinol oxidase that was not detected in either CLAs or CLso (Figure S2). The CydABCD of *L. crescens* has a close homologue in other members of the *Rhizobiaceae* and therefore was most likely lost by CLAs and CLso during genome reduction rather than acquired by *L. crescens* after the lineages diverged.

Cytochrome bd is unrelated to heme-copper oxidases and does not pump protons directly [23]. Cytochrome bd has a high O<sub>2</sub> affinity and is often expressed under microaerobic or Fe-limited conditions whereas cytochrome o oxidase expression is often limited to oxygen-rich environments [23,24]. CydABCD was found in other intracellular pathogens such as *Mycobacterium tuberculosis* F11 and *Leifsonia xyli xyli* CTCB07. However, based on the exclusive presence of Cyo in CLAs and CLso, it is recommended that lowered O<sub>2</sub> levels be avoided in culture. This is in stark contrast to the phloem environment that is characterized by greatly reduced O<sub>2</sub> levels [25].

### Membrane transport

**ABC Transporters.** Transporters are of particular importance in bacteria that have a greatly reduced synthetic metabolism such as *Liberibacter* species. Thirteen ABC transporters were found

in the *L. crescens* genome. This work pays particular attention to transporters present in *L. crescens* that were not identified in CLAs or CLso. Of these thirteen ABC transporters, five were identified only in the *L. crescens* genome: *niaP*, *ftsEX*, *fluBCD*, *oppABCD*, and *raxB*. These transporters may be unnecessary in the intracellular environment but still beneficial in culture.

The CLAs and CLso genomes lack *ftsE* and *ftsX*, which are involved in cell division [26]. An *ftsE*(Ts) mutation in *E. coli* results in deficient incorporation of K<sup>+</sup>-pump proteins (KdpA, Kup, TrkH, PhoA) into the cytoplasmic membrane [27]. Of these K<sup>+</sup>-pump genes, CLAs and CLso have only *kup*. Kup is a low affinity K<sup>+</sup> importer and in *E. coli* it functions during hyper-osmotic stress and in acidic environments similar to those of the phloem [28]. A large exogenous source of K<sup>+</sup> ions may be necessary for proper growth and division of CLAs and CLso.

CLAs and CLso lack *FhuBCD*, which is responsible for the uptake of Fe<sup>3+</sup> hydroxamate compounds such as ferrichrome [29]. Without this operon, CLAs and CLso may have limited iron scavenging and intracellular iron regulation capabilities. CLso contains a high affinity Fe<sup>2+</sup> transporter (EfeUOB). EfeU sequence from CLso has 54.4% amino acid sequence similarity to an iron permease protein in *L. crescens*; however, no homolog was identified in CLAs. The EfeUOB transporter is active under



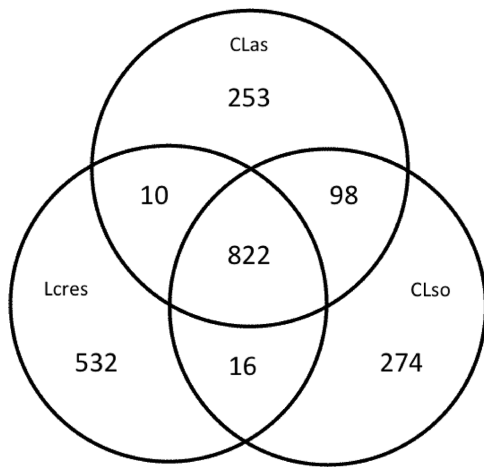

**Figure 2. Venn Diagram showing genes shared between all three *Liberibacter* genomes.** A total of 2005 separate genes were identified based on RAST orf predictions. A sequence-based comparison showed that 822 of these are shared between all *Liberibacter* species studied. *Liberibacter crescens* (Lcres); *Ca. Liberibacter asiaticus* (CLas); and *Ca. Liberibacter solanacearum* (CLso). doi:10.1371/journal.pone.0084469.g002

iron limitation and low pH [30]. The presence of this system in CLso was previously reported [8], and the function in *L. crescens* is undetermined. All three *Liberibacter* genomes contain an Fe(II)/Manganese transporter (SitABCD) and the zinc transporter

(ZnuABC). SitABCD is associated with virulence and resistance to oxidative stress [31].

The Opp ABC oligopeptide transporter is found only in *L. crescens*. OppABC functions in the recycling of cell wall peptides [32]. The operon has a different order in *L. crescens* (OppDABC) than in other organisms (OppABCD). The structure and sequence of the *L. crescens* OppDABC operon is most similar to that of the alphaproteobacteria *Roseobacter denitrificans* OCh114. Mutants of *Sinorhizobium meliloti* in oppA and oppB exhibit impaired growth on minimal medium supplemented with tetra peptides [33]. In *E. coli* Opp mutants lyse more quickly than wild type cells once all diaminopimelic acid (DAP) in the growth medium is exhausted. A consistent source of cell wall components in the intracellular environment may compensate for the lack of the system in CLas and CLso as well.

**Phosphotransferase systems.** No complete phosphotransferase systems (PTS) were identified in the studied *Liberibacter* genomes as previously noted by Lin et al 2011. *L. crescens* encodes proteins that participate in phosphotransferase systems (PTS) for mannose, ascorbate and nitrogen. Neither of the permease subunits of the mannose PTS were present in *L. crescens*. However, the cytoplasmic subunit, ManX, was identified. This is a pattern common to many alphaproteobacteria and the protein may serve a regulatory function [34]. *L. crescens* also encodes the EI (PtsP) and HPr (PtsO) of the nitrogen PTS which are not found in CLas or CLso. The nitrogen EIIA protein (PtsN) was not found in *L. crescens*.

The transmembrane component of the ascorbate PTS was present in all three *Liberibacter* genomes, but all genomes lacked the

**Table 3. Comparison of amino acid biosynthesis and transport in the *Liberibacter* species.**

| Amino Acid    | <i>L. crescens</i> BT-1 |                      | <i>Ca. L. asiaticus</i> |                      | <i>Ca. L. solanacearum</i> |                      |
|---------------|-------------------------|----------------------|-------------------------|----------------------|----------------------------|----------------------|
|               | Synthesis               | Specific Transporter | Synthesis               | Specific Transporter | Synthesis                  | Specific Transporter |
| Alanine       | -                       | -                    | -                       | -                    | -                          | -                    |
| Valine        | -                       | -                    | -                       | -                    | -                          | -                    |
| Leucine       | -                       | -                    | -                       | -                    | -                          | -                    |
| Isoleucine    | -                       | -                    | -                       | -                    | -                          | -                    |
| Proline       | +                       | +                    | -                       | +                    | -                          | +                    |
| Methionine    | -                       | +                    | -                       | -                    | -                          | -                    |
| Phenylalanine | +                       | -                    | -                       | -                    | -                          | -                    |
| Tryptophan    | +                       | -                    | -                       | -                    | -                          | -                    |
| Glycine       | +                       | +                    | +                       | +                    | +                          | +                    |
| Serine        | +                       | -                    | +                       | -                    | +                          | -                    |
| Threonine     | +                       | -                    | +                       | -                    | +                          | -                    |
| Cysteine      | +                       | -                    | -                       | -                    | -                          | -                    |
| Asparagine    | -                       | -                    | -                       | -                    | -                          | -                    |
| Glutamine     | +                       | -                    | +                       | -                    | +                          | -                    |
| Tyrosine      | +                       | -                    | -                       | -                    | -                          | -                    |
| Aspartic Acid | -                       | +                    | -                       | +                    | -                          | +                    |
| Glutamic Acid | -                       | -                    | -                       | -                    | -                          | -                    |
| Lysine        | +                       | -                    | +                       | -                    | +                          | -                    |
| Arginine      | +                       | -                    | +                       | -                    | +                          | -                    |
| Histidine     | +                       | -                    | -                       | -                    | -                          | -                    |
| Total         | 12/20                   |                      | 6/20                    |                      | 6/20                       |                      |

A general amino acid transporter was present in all three genomes and only additional, specific transporters are represented in this table. doi:10.1371/journal.pone.0084469.t003

## FOLATE BIOSYNTHESIS

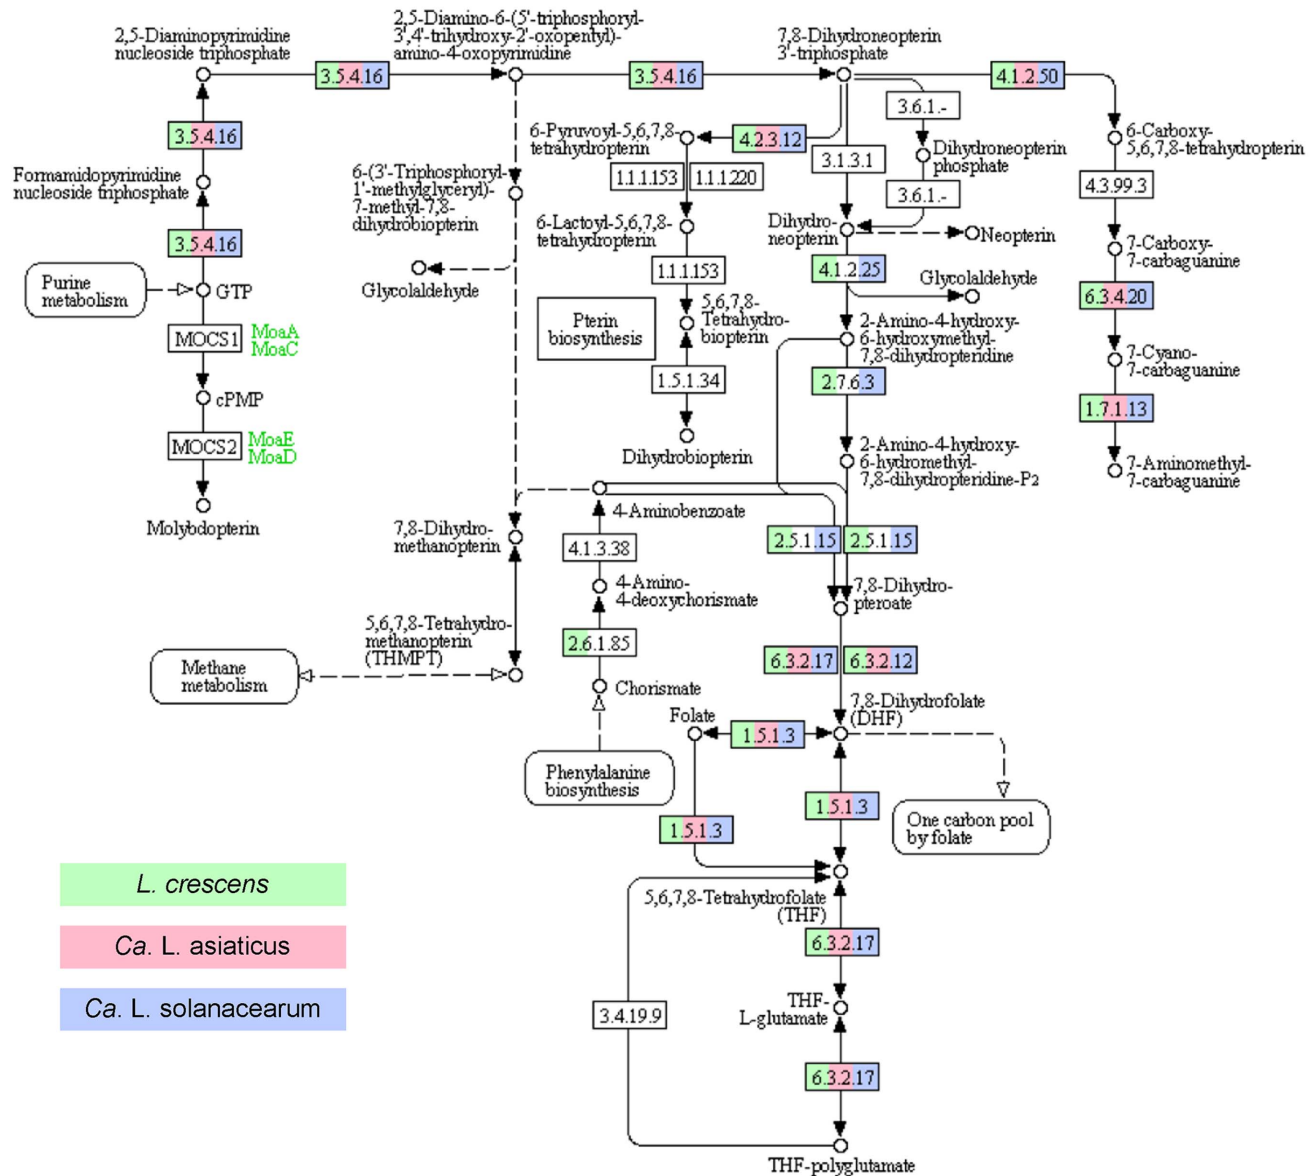

**Figure 3. KEGG pathway indicating the extent of Folate Biosynthesis in *Liberibacter* species.** All genomes lack alkaline phosphatase (EC 3.1.3.1). This pathway is further incomplete in *Ca. Liberibacter asiaticus*, which has lost several enzymes for the production of Dihydrofolate (DHF). doi:10.1371/journal.pone.0084469.g003

cytoplasmic components of this system. It is unclear if the transmembrane component is sufficient for the transport of ascorbate by *L. crescens*. However, all three *Liberibacter* species are assumed to utilize glucose as their primary carbon source.

**Secretion Systems.** All *Liberibacter* species have a complete Sec system, however, the twin arginine transport (TAT) system was only found in *L. crescens*. TAT has been shown to be important for the export of some virulence factors through the type 2 secretion system (T2SS). However, the T2SS was absent in all *Liberibacter* species studied. Type 1 secretion systems (T1SS) have been previously reported in CLAs and CLso [9,10]. However, the *tolC* component was not identified in any of the *Liberibacter*

genomes in this work. No other components of bacterial secretion systems were found in these organisms.

**Other Transporters.** The only transporter present in CLAs and CLso, but absent in *L. crescens*, is an NttA-family ATP/ADP transporter. This protein is thought to allow CLAs and CLso to utilize host-derived ATP and ADP [35]. No evidence was found in this genomic analysis to suggest that CLAs and CLso are entirely dependent on an extracellular source of ATP/ADP.

### Regulation

**Two Component Systems.** There are four, two component signal transduction systems (TCS) present in *L. crescens* that are

**Table 4.** Comparison of cofactor de novo synthesis and transport in the *Liberibacter* species.

| Cofactor                 | <i>L. crescens</i> BT-1 |                      | <i>Ca. L. asiaticus</i> |                      | <i>Ca. L. solanacearum</i> |                      |
|--------------------------|-------------------------|----------------------|-------------------------|----------------------|----------------------------|----------------------|
|                          | Synthesis               | Specific Transporter | Synthesis               | Specific Transporter | Synthesis                  | Specific Transporter |
| Thiamine (B1)            | +                       | -                    | -                       | +                    | -                          | +                    |
| Riboflavin (B2)          | +                       | -                    | +                       | -                    | +                          | -                    |
| Pyridoxine(B6)           | +                       | -                    | +                       | -                    | +                          | -                    |
| Nicotinamide             | -                       | -                    | -                       | -                    | -                          | -                    |
| Pantothenate (B5)        | -*                      | -                    | -                       | -                    | -                          | -                    |
| Biotin (B7)              | +                       | -                    | +                       | -                    | +                          | -                    |
| Folate (B9)              | +                       | -                    | -                       | -                    | +                          | -                    |
| Cobalamin(B12)           | -                       | -                    | -                       | -                    | -                          | -                    |
| pyridoxal phosphate (B6) | -                       | -                    | -                       | -                    | -                          | -                    |
| Niacin (B3)              | -                       | +                    | -                       | -                    | -                          | -                    |

\**L. crescens* is able to convert L-aspartate to pantothenate.  
doi:10.1371/journal.pone.0084469.t004

absent or incomplete in CLAs and CLso: EnvZ/OmpR, DivJK, NtrXY, and ChvGI. This gives *L. crescens* an increased ability to regulate gene expression in response to extracellular stimuli.

EnvZ/OmpR regulates gene expression in response to changing osmotic pressure [36]. The absence of this system in CLAs and CLso suggests that these two pathogens are sensitive to changes in osmotic pressure, which may occur during culturing. However, another cultured plant pathogen, *X. fastidiosa*, also lacks this system suggesting that the transition from an intracellular environment to growth in vitro does not require EnvZ/OmpR.

*L. crescens* has the histidine kinase, DivJ, which is not present in the CLAs or CLso genomes. However, DivK, which is phosphorylated by DivJ, is present in both CLAs and CLso. DivJ participates in cell division [37]. A DivJ null mutant in *Caulobacter crescentus* exhibited slowed growth and an altered phenotype; cells became slightly elongated with aberrant polar localization [38]. The absence of DivJ in CLAs and CLso may be partly responsible for observed slow growth rates in planta but is unlikely to selectively hinder growth in vitro.

The NtrY/NtrX two component regulatory system seems to be degraded in CLAs and CLso. An *ntrX*-like gene was found in CLso but an *ntrY* homologue was not identified. Neither *ntrX* nor *ntrY* were present in CLAs. NtrY/NtrX was first annotated in *Azorhizobium caulinodans* PRS571 where it is involved in nitrogen fixation [39]. A knock out of *ntrX* in *A. caulinodans* lead to diminished growth on nitrate medium. This two component regulatory system may be important to nitrogen assimilation by *L. crescens* and allow it to grow more vigorously in culture.

*Liberibacter crescens* possesses the Chv regulatory gene cluster, ChvG/ChvI, similar to those found in *R. leguminosarum*, *S. meliloti*, and *A. tumefaciens*. ChvG responds to acidic conditions during plant wounding and activates ChvI, which regulates the expression of a broad range of virulence and metabolic genes [40]. A ChvI null mutation in *S. meliloti* 1021 exhibited decreased growth under acidic conditions, no extracellular polysaccharide (EPS) production, reduced poly-3-hydroxybutyrate (PHB), and no growth on complex media [41]. Other studied alphaproteobacterial ChvG/ChvI proteins are required for host invasion and tumor formation [42]. Because of its association with growth on complex media, the lack of ChvG/ChvI in CLAs and CLso provides valuable insight into the inability to cultivate these species.

CLAs and CLso lack several sensor histidine kinases found in *L. crescens*. However, the CLAs and CLso genomes share a sensory histidine kinase of unknown function that has no close homolog in *L. crescens*. This gene is feature YP\_004062632.1 in *Ca. L. solanacearum* and YP\_003064826.1 in *Ca. L. asiaticus*. The target of this histidine kinase has yet to be determined and its environmental trigger is unknown.

**Copper Homeostasis.** CLAs and CLso lack multicopper oxidase (MCO) found in *L. crescens*. The multicopper oxidase in *L. crescens* is most closely related to the MCO in *Rhizobium leguminosarum* bv. viciae 3841. MCO is flanked by the same genes in *L. crescens* and *R. leguminosarum*. MCO has been implicated in copper tolerance and copper homeostasis, as well as oxidative stress response [43]. The *L. crescens* MCO is not thought to contribute directly to growth in culture.

**Zinc Regulation.** The zinc uptake regulation protein ZUR is present in *L. crescens* but is not found in CLAs or CLso. ZUR regulates zinc uptake via the Znu ABC transporter [44]. Despite the missing regulator in CLAs and CLso, the ZnuABC transporter is present in all three sequenced *Liberibacter* genomes. CLAs and CLso possess the zinc transport mechanism, but are unable to regulate this uptake in the same manner as *L. crescens*.

**Stringent Response.** The stringent response gene, *spoT*, via (p)ppGpp synthetase II [45] is only found in *L. crescens*. In *Salmonella* infections, ppGpp mediates the rapid metabolic shift as the pathogen moves between environments. [46,47]. SpoT and the surrounding gene cluster in *L. crescens* are closely related to those in *R. leguminosarum*, *A. tumefaciens*, and *S. meliloti* 1021. This system is therefore presumed to be functional. It seems unusual that intracellular pathogens such as CLAs and CLso would not utilize the ppGpp system to mediate the switch from the insect vector to the plant phloem. This lack of widespread gene regulation may also be contributing to difficulties with maintaining these strains in culture.

The C4-type zinc finger protein family DksA/TraR is found in *L. crescens* but is not present in CLAs or CLso. This zinc finger has been linked to ppGpp and the stringent response. DksA acts to overcome stalling of replication forks due to the global changes in transcription initiated by the stringent response [48]. CLAs and CLso lack the stringent response, and are not expected to experience the associated, slowed chromosome replication. Therefore, DksA is likely unnecessary in CLAs and CLso.

## Cell structure

**Lipid A Biosynthesis.** All *Liberibacter* species are predicted to produce lipid A, a subunit of lipopolysaccharide. However, only *L. crescens* possesses the membrane protein LpxL. An *lpxL* *E. coli* mutation is lethal at temperatures above 32.5 degrees C [49]. The absence of LpxL in CLas may explain recent observations in which controlled heating of CLas-infected citrus eliminates HLB infection under greenhouse conditions [50].

**Peptidoglycan Recycling.** The peptidoglycan amino acid recycling system (*amiD*, *ldcA*, *amiA*, MCPase, OppD, MltB, *slt*) is present in *L. crescens* but absent in CLas and CLso (Table 5). Homologues for two other genes involved in cell wall recycling, *ampG* and *nagZ*, were absent in all *Liberibacter* species. An *ldcA* *E. coli* mutant spontaneously lyses at stationary phase [51]. Furthermore, the murein hydrolases MCPase, *amiD*, and *slt* are found only in the *L. crescens* genome. Murein hydrolases are involved in peptidoglycan recycling [52]. *AmiD* is a periplasmic N-acetylmyr-amoyl-L-alanine amidase reliant on the TAT pathway [53]. *AmiD* is the functional equivalent of *AmpD*, which is a cytoplasmic anhydro-N-acetylmuramyl-L-alanine amidase in *Escherichia coli* [54]. Two *amiD* copies are present in *L. crescens* with one copy in the prophage region. The murein hydrolases MltB and DacD are present in all *Liberibacter* genomes. The absence of cell wall recycling pathway components in the CLas and CLso genomes may contribute to the lack of sustained growth in culture, although this pathway is apparently not needed for CLas survival in plant or insect hosts.

## Phage

All three sequenced *Liberibacter* species contain two temperate phage regions of the family *Podoviridae* in the order *Caudovirales* [7,9,10]. The *L. crescens* prophage regions exhibited very low sequence similarity to each other and to those previously described in CLas and CLso. The prophage regions in *L. crescens* contain proteins of high sequence similarity to integrase, exonuclease, lysozyme, terminase, portal protein, head protein, and other structural proteins common to *Podoviridae* (Table S2). A single phage protein of unknown function is conserved among all three species with a sequence identity greater than 25%.

The very low sequence similarity observed between the integrated prophages of the *L. crescens* and CLas and CLso suggests that the phages were acquired after the lineages of these bacteria diverged. The functions conserved in these prophages are primarily structural in nature which may indicate that all have the potential to re-enter a lytic growth phase.

## Virulence and Host Interaction

**Effectors.** Extra-cytoplasmic proteins produced by CLas and CLso may be interacting with their plant and insect hosts. A previous study predicted 107 potentially secreted proteins encoded by the CLas genome [16]. Homologs to 60 of these proteins were also identified in the *L. crescens* genome. Of those 47 effector proteins not found in *L. crescens*, 16 are also present in CLso. The majority of the potential effectors identified in CLas and CLso are hypothetical with no established function. The phenotypes of many of the 59 effector proteins in common with all *Liberibacter* can be studied in *L. crescens* as this strain is culturable.

**Indole-3-acetamide Pathway.** As with many plant associated bacteria [55,56,57], the *L. crescens* genome encodes both proteins necessary for the production of indole-3-acetamide (IAM). These genes, IAM hydrolase and tryptophan monooxygenase, were not found in CLas or CLso. IAM hydroxylase and tryptophan monooxygenase cluster together on the *L. crescens* genome and are most closely related to orthologs in *Pseudomonas*

*syringae* pv. *syringae* B728a and *Pseudomonas chlororaphis* subsp. *aureofaciens* 30–84 respectively. A member of the *Pseudomonas syringae* group was isolated from papaya [58] and the IAM pathway in *L. crescens* may represent a horizontal gene transfer event from a related *Pseudomonas*. Auxin production by *Pseudomonas syringae* is thought to increase its virulence by overriding the plant's natural defenses [59]. However, in *Agrobacterium tumefaciens*, a close relative to *Liberibacter crescens*, auxin production is linked to tumor formation [60]. A dedicated IAM efflux system was not found in any of *Liberibacter* genomes. The auxin efflux carrier (AEC)-family secondary transporter in *Agrobacterium tumefaciens* C58 consists of two proteins *Atu0080* and *Atu1795*, neither of which were found in *L. crescens*. AEC from *P. syringae* was also queried against the *L. crescens* genome with no similar sequences detected. The presence of the IAM pathway in *L. crescens* may indicate a role in plant colonization and potentially pathogenesis.

**Bacteriocin Production.** All three *Liberibacter* genomes possess the Colicin V production pathway. These genes are most closely related to those in *R. leguminosarum* and exhibit the same gene clustering. *L. crescens* and CLso encode the *DedE* bacteriocin. The *dedE* gene in CLas has been greatly degraded and is unlikely to be functional. The analogous colicin V toxin gene in *R. leguminosarum* was previously shown to have heteroantagonistic activity and was most effective against closely related strains [61].

A putative ABC transporter in *L. crescens* shares a high amino acid sequence similarity of 69.1% with a Colicin V efflux system in *Burkholderia pseudomallei* [gi: 167826023]. This feature is adjacent to an *hlyD* family secretion gene that is most similar to the *mchE* gene in *Serratia marcescens* Db11 [EMBL: AGE18134], which is associated with the efflux of that organism's microcin peptide. This system is the probable route for colicin V efflux in *L. crescens*. The *L. crescens* bacteriocin may have applications for the control of both CLas and CLso.

## Conclusions

The uncultured plant pathogens *Ca. L. asiaticus* and *Ca. L. solanacearum* have undergone greater genome reduction than their closest cultured relative, *L. crescens*. In the process, CLas and CLso have eliminated many metabolic and regulatory functions that may be needed for growth on artificial medium. The contribution of these biosynthetic deficiencies to the current inability to maintain CLas and CLso in culture is unknown. However, many are likely compensated for through the addition of vitamins and amino acids to culture media.

CLas and CLso have lost an alternate terminal cytochrome, the stringent response, and multiple two component regulatory systems during genome reduction. These losses reduce CLas and CLso's ability to sense and adjust to environmental fluctuations. As an intracellular pathogen, CLas and CLso may not be exposed to drastic environmental changes. However, this diminished flexibility may reduce their ability to effectively transition from the intracellular environment to a free-living state in culture.

CLas and CLso membrane integrity and rate of replacement may be compromised due to the lack of *lpxL* and several enzymes for the recycling of peptidoglycan components. Collectively, these losses may result in a more fragile cell that is highly susceptible to physical damage and environmental stressors that it would not encounter in the intracellular environment but which are difficult to avoid when transferring to artificial growth medium.

Very little has been determined about the mechanism underlying disease development in HLB and psyllid yellows. *L. crescens* has an indole-3-acetamide production pathway not found in CLas and CLso, which may affect its interaction with the plant



**Table 5.** Peptidoglycan recycling systems of *Liberibacter* species.

| Gene              | Presence       | Activity                                        |
|-------------------|----------------|-------------------------------------------------|
| amiD (ampD, oppC) | Lc*            | anhydro-N-acetylmuramyl-L-alanine amidase       |
| ldcA              | Lc             | Muramoyltetrapeptide carboxypeptidase           |
| amiA              | Lc             | N-acetylmuramoyl-L-alanine amidase              |
| MCPase            | Lc             | Muramoyltetrapeptide carboxypeptidase           |
| slt               | Lc             | Soluble lytic murein transglycosylase           |
| MltB              | Lc, CLas, CLso | Membrane-bound lytic murein transglycosylase B  |
| DacD              | Lc, CLas, CLso | DacD D-alanyl-D-alanine carboxypeptidase        |
| OppD              | Lc             | Oligopeptide transporter; ATP-binding component |

Features listed are based on the SEED peptidoglycan recycling subsystem. All sequences in *L. crescens* were aligned to *Ca. L. solanacearum*, and *Ca. L. asiaticus* to confirm SEED annotation. Organisms containing each feature are listed below.

\*There are two instances of amiD in the *L. crescens* genome one of which appears to be within the LC2 prophage region.  
doi:10.1371/journal.pone.0084469.t005

host. *L. crescens* and CLso also encode a bacteriocin similar to those shown to inhibit the growth of closely related strains in other alphaproteobacteria. The dearth of differences in pathogenicity or virulence genes between *L. crescens* and the pathogens CLAs and CLso suggests that *L. crescens* may be a pathogen on an as yet unidentified plant host. Alternatively, hypothetical proteins in CLso and CLAs that are absent in *L. crescens* may be playing a role in pathogenicity. Other alternatives include the possibilities that *L. crescens* may serve as a plant growth-promoting symbiont or may exist in plants solely as a non-pathogenic endophyte.

No lone short-coming was found in the CLAs and CLso genomes that explains their inability to grow under the same conditions as their closest cultured relative, *Liberibacter crescens*. Rather it seems to be a combination of metabolic, structural, and regulatory processes working in concert to facilitate the independent growth of *L. crescens*. The study of select *L. crescens* knock out mutants is anticipated to expand on this genome comparison and assign additional functional significance to the differences observed herein. Further description and genomic sequencing of *Liberibacter* species will also improve the sensitivity of metabolic modeling, which may be utilized for the development of growth medium as well as the study of genome reduction in the diversification of this important genus.

## Supporting Information

**Figure S1 *Liberibacter crescens* growth.** *Liberibacter crescens* was grown in triplicate in liquid BM7 medium at 28°C and 125 rpm. Optical density was measured at 600 nm in a BioTek Synergy HT Microplate reader.  
(PDF)

**Figure S2 *Liberibacter crescens* cell.** *Liberibacter crescens* has many functions not found in either CLAs or CLso. These fall into four broad categories: regulation, central metabolism, transport, and host associations. Additional cellular components not found in CLAs or CLso are shown in red. The cytosolic component of the nitrate two-component system is found in CLso (red stripes) while the outer membrane portion of the type 1 secretion system is not found in any of the genomes studied (grey).  
(PDF)

**Figure S3 Phenylalanine, Tyrosine, and Tryptophan Biosynthesis.** *Liberibacter crescens* has a complete shikimate pathway which allows for the biosynthesis of three amino acids

not produced by *Ca. Liberibacter asiaticus* or *Ca. Liberibacter solanacearum*.

(PDF)

**Figure S4 Pantothenate and CoA Biosynthesis KEGG map.** All three *Liberibacter* species encode the necessary enzymes for the conversion of Pantothenate to Coenzyme A. Synthesis of Pantothenate from pyruvate is less degraded in *L. crescens* however it is still non-functional. This partial pathway in *L. crescens* appears to represent a combination of genome reduction as well as horizontal gene transfer. Ketol-acid reductoisomerase (EC 1.1.1.86) of *L. crescens* is most closely related to the same enzyme in other members of the Rhizobiales; while 3-methyl-2-oxobutanoate hydroxymethyltransferase (EC. 2.1.2.11) and pantoate beta-alanine ligase (EC. 6.3.2.1) share 70 and 65 percent sequence homology respectively with members of the Enterobacteriaceae family.

(PDF)

**Figure S5 The Urea Cycle and metabolism of associated amino acids in the *Liberibacter* genus.** All three *Liberibacter* species studied lacked the arginase enzyme for the production of Urea from Arginine.

(PDF)

**Figure S6 Carbohydrate Metabolism of *Liberibacter* species.** (A) Glucose-6-phosphate isomerase is not present in *Ca. L. asiaticus* or *Ca. L. solanacearum*. (B) A modified pentose phosphate pathway may be utilized by CLAs and CLso to bypass the glucose-6-phosphate that they lack.

(PDF)

**Table S1 Hypothetical genes of unknown function.** Nucleotide sequence comparison of *L. crescens*, *Ca. L. asiaticus*, and *Ca. L. solanacearum* identifying conserved hypothetical genes.  
(XLSX)

**Table S2 *Liberibacter crescens* prophages.** Putative annotation for prophage genes.  
(XLSX)

## Acknowledgments

The authors thank Dr. Valérie de Crécy-Lagard for her inspired guidance in this research; as well as Kin Lai and Alexandria Ardisson who provided the final *L. crescens* growth curve.

## Author Contributions

Conceived and designed the experiments: JRF MTL JNE CSH MJD EWT. Performed the experiments: JRF MTL CMM JNE EWT. Analyzed

the data: JRF MTL JNE CSH EWT. Contributed reagents/materials/analysis tools: JRF MTL CMM JNE CSH EWT. Wrote the paper: JRF MTL EWT.

## References

- Raddadi N, Gonella E, Camerota C, Pizzinat A, Tedeschi R, et al. (2011) '*Candidatus Liberibacter europaeus*' sp nov that is associated with and transmitted by the psyllid *Cacopsylla pyri* apparently behaves as an endophyte rather than a pathogen. *Environ Microbiol* 13: 414–426.
- Jagoueix S, Bove J, Garnier M (1994) The phloem-limited bacterium of greening disease of citrus is a member of the  $\alpha$  subdivision of the proteobacteria. *Internat J System Bacteriol* 44: 379–386.
- Teixeira D, Saillard C, Eveillard S, Danet JL, Inacio da Costa P, et al. (2005). '*Candidatus Liberibacter americanus*', associated with citrus Huanglongbing (greening disease) in Sao Paulo State, Brazil. *Internat J System Environ Microbiol* 55: 1857–1862.
- Hansen AK, Trumble JT, Stouthamer R, Paine TD (2008) A New Huanglongbing Species, '*Candidatus Liberibacter psyllaurosus*,' Found To Infect Tomato and Potato, Is Vecteded by the Psyllid *Bactericera cockerelli*. *Appl Environ Microbiol* 74: 5862–5865.
- Secor GA, Rivera VV, Abad JA, Lee I-M, Clover GRG, et al. (2009) Association of '*Candidatus Liberibacter solanacearum*' with zebra chip disease of potato established by graft and psyllid transmission, electron microscopy, and PCR. *Plant Dis* 93: 574–583.
- Liefting LW, Weir BS, Pennycook SR, Clover GRG (2009) '*Candidatus Liberibacter solanacearum*', associated with plants in the family Solanaceae. *Internat J System Environ Microbiol* 59: 2274–2276.
- Leonard MT, Fagen JR, Davis-Richardson AG, Davis MJ, Triplett EW (2012) Complete genome sequence of *Liberibacter crescens* BT-1. *Standards Genomic Sci* 7: 271–283.
- Hartung JS, Shao J, Kuykendall LD (2011) Comparison of the '*Ca. Liberibacter asiaticus*' genome adapted for an intracellular lifestyle with other members of the Rhizobiales. *PLoS ONE* 6: e23289.
- Lin H, Lou B, Glynn JM, Doddapaneni H, Ceverolo EL, et al. (2011) The complete genome sequence of '*Candidatus Liberibacter solanacearum*', the bacterium associated with potato zebra chip disease. *PLoS ONE* 6: e19135.
- Duan Y, Zhou L, Hall DG, Li W, Doddapaneni H, et al. (2009) Complete genome sequence of citrus Huanglongbing bacterium, '*Candidatus Liberibacter asiaticus*' obtained through metagenomics. *Molec Plant Microbe Interact* 22: 1011–1020.
- Aziz RK, Bartels D, Best AA, DeJongh M, Disz T, et al (2008) The RAST Server: Rapid Annotations using Subsystems Technology. *BMC Genomics* 9: 75.
- Overbeek R, Begley T, Butler RM, Choudhuri JV, Chuang HY, et al. (2008) The subsystems approach to genome annotation and its use in the project to annotate 1000 genomes. *Nucleic Acids Res* 33: 5691–5702.
- Kanehisa M, Goto S (2000) KEGG: Kyoto Encyclopedia of Genes and Genomes. *Nucleic Acids Res* 28: 27–30.
- Kanehisa M, Goto S, Sato Y, Furumichi M, Tanabe M (2012) KEGG for integration and interpretation of large-scale molecular datasets. *Nucleic Acids Res* 40: D109–D114.
- Altschul SF, Gish W, Miller W, Myers EW, Lipman DJ (1990) Basic local alignment search tool. *J Mol Biol* 215: 403–410.
- Cong Q, Kinch LN, Kim B-H, Grishin NV (2012) Predictive sequence analysis of the '*Candidatus Liberibacter asiaticus*' proteome. *PLoS ONE* 7: e41071.
- Besemer J, Borodovsky M (2005) GeneMark: web software for gene finding in prokaryotes, eukaryotes, and viruses. *Nucleic Acids Res* 33: W451–W454.
- Jeanguenin L, Lara-Nunez A, Rodionov DA, Ostermand AL, Komarova NY, et al. (2012) Comparative genomics and functional analysis of the NiaP family uncover nicotinate transporters from bacteria, plants, and mammals. *Funct Integr Genomics* 12: 25–34.
- Kusano T, Berberich T, Tateda C, Takahashi Y (2008) Polyamines: essential factors for growth and survival. *Planta* 228: 367–381.
- Shaw FL, Elliott KA, Kinch LN, Fuell C, Phillips MA, et al. (2010) Evolution and multifarious horizontal transfer of an alternative biosynthetic pathway for the alternative polyamine sym-Homospermidine. *J Biol Chem* 285: 14711–14723.
- White JP, Prell J, Ramachandran VK, Poole PS (2009) Characterization of a gamma-aminobutyric acid transport system of *Rhizobium leguminosarum* bv. viciae 3841. *J Bacteriol* 191: 1547–1555.
- Li W, Cong Q, Pei J, Kinch LN, Grishin NV (2012) The ABC transporters in *Candidatus Liberibacter asiaticus*. *Proteins: Structure, Function, and Bioinformatics* 80: 2614–2628.
- Borisov VB, Gennis RB, Hemp J, Verkhovskiy MI (2011) The cytochrome bd respiratory oxygen reductases. *Biochim Biophys Acta* 1807: 1398–1413.
- Cotter PA, Chepuri V, Gennis RB, Gunsalus RP (1990) Cytochrome o (cyoABCDE) and d (cydAB) oxidase gene expression in *Escherichia coli* is regulated by oxygen, pH, and the *fnr* gene product. *J Bacteriol* 172: 6333–6338.
- von Dongen JT, Schurr U, Pfister M, Geigenberger P (2003) Phloem metabolism and function have to cope with low internal oxygen. *Plant Physiol* 131: 1529–1543.
- Taschner PE, Huls PG, Pas E, Woldringh CL (1988) Division behaviour and shape changes in isogenic *fts*, *ftsQ*, *ftsA*, *pppB*, and *ftsE* cell division mutants of *Escherichia coli* during temperature shift experiments. *J Bacteriol* 170: 1533–1540.
- Ukai H, Matsuzawa H, Ito K, Yamada M, Nishimura A (1998) *ftsE(Ts)* affects translocation of K<sup>+</sup>-pump proteins into the cytoplasmic membrane of *Escherichia coli*. *J Bacteriol* 180: 3663–3670.
- Trchounian A, Kobayashi H (1999) Kup is the major K<sup>+</sup> uptake system in *Escherichia coli* upon hyper-osmotic stress at a low pH. *FEBS Lett* 447:144–148.
- Koster W, Braun V (1990) Iron (III) hydroxamate transport into *Escherichia coli*. Substrate binding to the periplasmic PhuD protein. *J Biol Chem* 265: 21407–21410.
- Cao J, Woodhall MR, Alvarez J, Cartron ML, Andrews SC (2007) EfcUOB (YcdNOB) is a tripartite, acid-induced and CpxAR-regulated, low-pH Fe<sup>2+</sup> transporter that is cryptic in *Escherichia coli* K-12 but functional in *E. coli* O157:H7. *Mol Microbiol* 65: 857–875.
- Sabri M, Leveille S, Dozois CM (2006) The SitABCD homologue from an avian pathogenic *Escherichia coli* strain mediates transport of iron and manganese and resistance to hydrogen peroxide. *Microbiology* 152: 745–758.
- Goodell EW, Higgins CF (1987). Uptake of Cell Wall Peptides by *Salmonella typhimurium* and *Escherichia coli*. *J Bacteriol*. 169: 3861–3865.
- Nogales J, Munoz S, Olivares J, Sanjuan J (2009) Genetic characterization of oligopeptide uptake systems in *Sinorhizobium meliloti*. *FEMS Microbiol Lett*. 293: 177–187.
- Barabote RD, Saier MH (2005) Comparative genomic analyses of the bacterial phosphotransferase system. *Microbiol Molec Biol Rev*. 69: 608–634.
- Vahling CM, Duan Y, Lin H (2010) Characterization of an ATP translocase identified in the destructive plant pathogen '*Candidatus Liberibacter asiaticus*'. *J Bacteriol* 192: 834–840.
- Cai SJ, Inouye M (2002) EnvZ-OmpR interaction and osmoregulation in *Escherichia coli*. *J Biol Chem* 277: 24155–24161.
- Cabantous S, Guillet V, Ohta N, Newton A, Samama JP (2002) Characterization and crystallization of DivK, an essential response regulators for cell division and differentiation in *Caulobacter crescentus*. *Acta Crystallogr D Biol Crystallogr*. 58: 1249–1251.
- Pierce DL, O'Donnell DS, Allen RC, Javens JW, Allen RC, et al. (2006) Mutations in DivL and CckA rescue a *divJ* null mutant of *Caulobacter crescentus* by reducing the activity of CtrA. *J Bacteriol* 188: 2473–2482.
- Pawlowski K, Klosse U, and de Bruijn FJ (1991) Characterization of a novel *Azorhizobium caulinodans* ORS571 two-component regulatory system, NtrY/NtrX, involved in nitrogen fixation and metabolism. *Mol Gen Genet* 231: 124–138.
- Li L, Jia Y, Hou Q, Charles TC, Nester EW, et al. (2002) A global pH sensor: *Agrobacterium* sensor protein ChvG regulates acid-inducible genes on its two chromosomes and Ti plasmid. *Proc Natl Acad Sci (USA)* 99:12369–12374.
- Wang C, Kemp J, Da Fonseca IO, Equi RC, Sheng X, et al. (2010) *Sinorhizobium meliloti* 1021 Loss-of-function deletion mutation in *chvI* and its phenotypic characteristics. *Molec Plant Microbe Interact* 2: 153–160.
- Charles TC, Nester EW (1993) A chromosomally encoded two-component sensory transduction system is required for virulence of *Agrobacterium tumefaciens*. *J Bacteriol* 175: 6614–6625.
- Grass G, Rensing C (2001) Genes involved in copper homeostasis in *Escherichia coli*. *J Bacteriol* 183:2145–2147.
- Patzer SI, Hantke K (2000) The zinc-responsive regulator Zur and its control of the *znu* gene cluster encoding the ZnuABC zinc uptake system in *Escherichia coli*. *J Biol Chem* 275: 24321–24332.
- Hernandez VJ, Bremer H (1991) *Escherichia coli* ppGpp synthetase II activity requires *spoT*. *J Biol Chem* 266: 5991–5999.
- Thompson A, Rolfe MD, Lucchini S, Schwerk P, Hinton JCD, et al. (2006) The bacterial signal molecule, ppGpp, mediates the environmental regulation of both the invasion and intracellular virulence gene programs of salmonella. *J Biol Chem* 281: 30112–30121.
- Jain V, Kumar M, Chatterji D (2006) ppGpp: stringent response and survival. *J Microbiol Seoul* 44: 1–10.
- Tehranchi AK, Blankschien MD, Xhang Y, Halliday JA, Sarivatsan A, et al. (2010) The transcription factor DksA prevents conflicts between DNA replication and transcription machinery. *Cell* 141: 595–605.
- Karow M, Fayet O, Georgopoulos C (1992) The lethal phenotype caused by null mutations in the *Escherichia coli* *htrB* gene is suppressed by mutations in the *accBC* operon, encoding two subunits of acetyl coenzyme A carboxylase. *J Bacteriol* 174: 7407–7418.
- Hoffman MT, Doud MS, Williams L, Zhang M-Q, Ding F, et al. (2013) Heat treatment eliminates '*Candidatus Liberibacter asiaticus*' from infected citrus trees under controlled conditions. *Phytopathol* 103: 15–22.
- Templin MF, Ursinus A, Holtje J-V (1999) A defect in cell wall recycling triggers autolysis during the stationary growth phase of *Escherichia coli*. *EMBO J* 18: 4108–4117.

52. Vollmer W, Joris B, Charlier P, Foster S (2008) Bacterial peptidoglycan (murein) hydrolases. *FEMS Microbiol Rev* 32: 259–286.
53. Bernhardt TG, de Boer PAJ (2003) The *Escherichia coli* amidase AmiC is a periplasmic septal ring component exported via the twin-arginine transport pathway. *Molec Microbiol* 48: 1171–1182.
54. Uehara T, Park JI (2007) An anhydro-N-acetylmuramyl-L-alanine amidase with broad specificity tethered to the outer membrane of *Escherichia coli*. *J Bacteriol* 189: 5634–5641.
55. Manulis S, Shafir H, Epstein E, Lichter A, Barash I (1994) Biosynthesis of indole-3-acetic acid via the indole-3-acetamide pathway in *Streptomyces* spp. *Microbiology* 140: 1045–1050.
56. Kobayashi M, Suzuki T, Fujita T, Masuda M, Shimizu S (1995) Occurrence of enzymes involved in biosynthesis of indole-3-acetic acid from indole-3-acetonitrile in plant-associated bacteria, *Agrobacterium* and *Rhizobium*. *Proc Natl Acad Sci (USA)* 92: 714–718.
57. Patten CL, Glick BR (1996) Bacterial biosynthesis of indole-3-acetic acid. *Can J Microbiol* 42: 207–220.
58. Spaepen S, Vanderleyden J (2011) Auxin and plant-microbe interactions. *Cold Spring Harb Perspect Biol*.
59. Navarro L, Dunoyer P, Florence J, Arnold B, Dharmasiri N, et al. (2006) A plant miRNA contributes to antibacterial resistance by repressing auxin signaling. *Science* 312: 436–439.
60. Amasino RM, Miller CO (1982) Hormonal control of tobacco crown gall tumor morphology. *Plant Physiol* 69: 389–392.
61. Hafeez FY, Nacem FI, Nacem R, Zaidi AH, Malik KA (2005) Symbiotic effectiveness and bacteriocin production by *Rhizobium leguminosarum* bv. *viciae* isolated from agricultural soils in Faisalabad. *Environ Experiment Botany*. 54:142–147.
